# Supplementary material for: Composition-dependent in vitro apatite formation at mesoporous bioactive glass-surfaces quantified by solid-state NMR and powder XRD
Source: Royal Society of Chemistry journal article supplement (doi:10.1039/c5ra13410b), 2015-01-01
Supplement: c5ra13410b1.pdf [file c5ra13410b1.pdf]

## Electronic Supplementary Information for Composition-Dependent In Vitro Apatite Formation at Mesoporous Bioactive Glass-Surfaces Quantified by Solid-State NMR and Powder XRD

Claudia Turdean-Ionescu<sup>a</sup>, Baltzar Stevansson<sup>a</sup>, Jekabs Grins<sup>a</sup>, Isabel Izquierdo-Barba<sup>b,c</sup>,  
Ana García<sup>b,c</sup>, Daniel Arcos<sup>b,c</sup>, María Vallet-Regí<sup>b,c</sup>, and Mattias Edén<sup>a,\*</sup>

<sup>a</sup>Department of Materials and Environmental Chemistry, Arrhenius Laboratory, Stockholm  
University, SE-106 91 Stockholm, Sweden

<sup>b</sup>Departamento de Química Inorgánica y Bioinorgánica, Facultad de Farmacia, Universidad  
Complutense de Madrid. Instituto de Investigación Sanitaria Hospital 12 de Octubre i+12, 28040  
Madrid, Spain

<sup>c</sup>Networking Research Center on Bioengineering, Biomaterials and Nanomedicine (CIBER-BBN)  
Madrid, Spain

\*Corresponding author. E-mail: *mattias.eden@mmk.su.se*

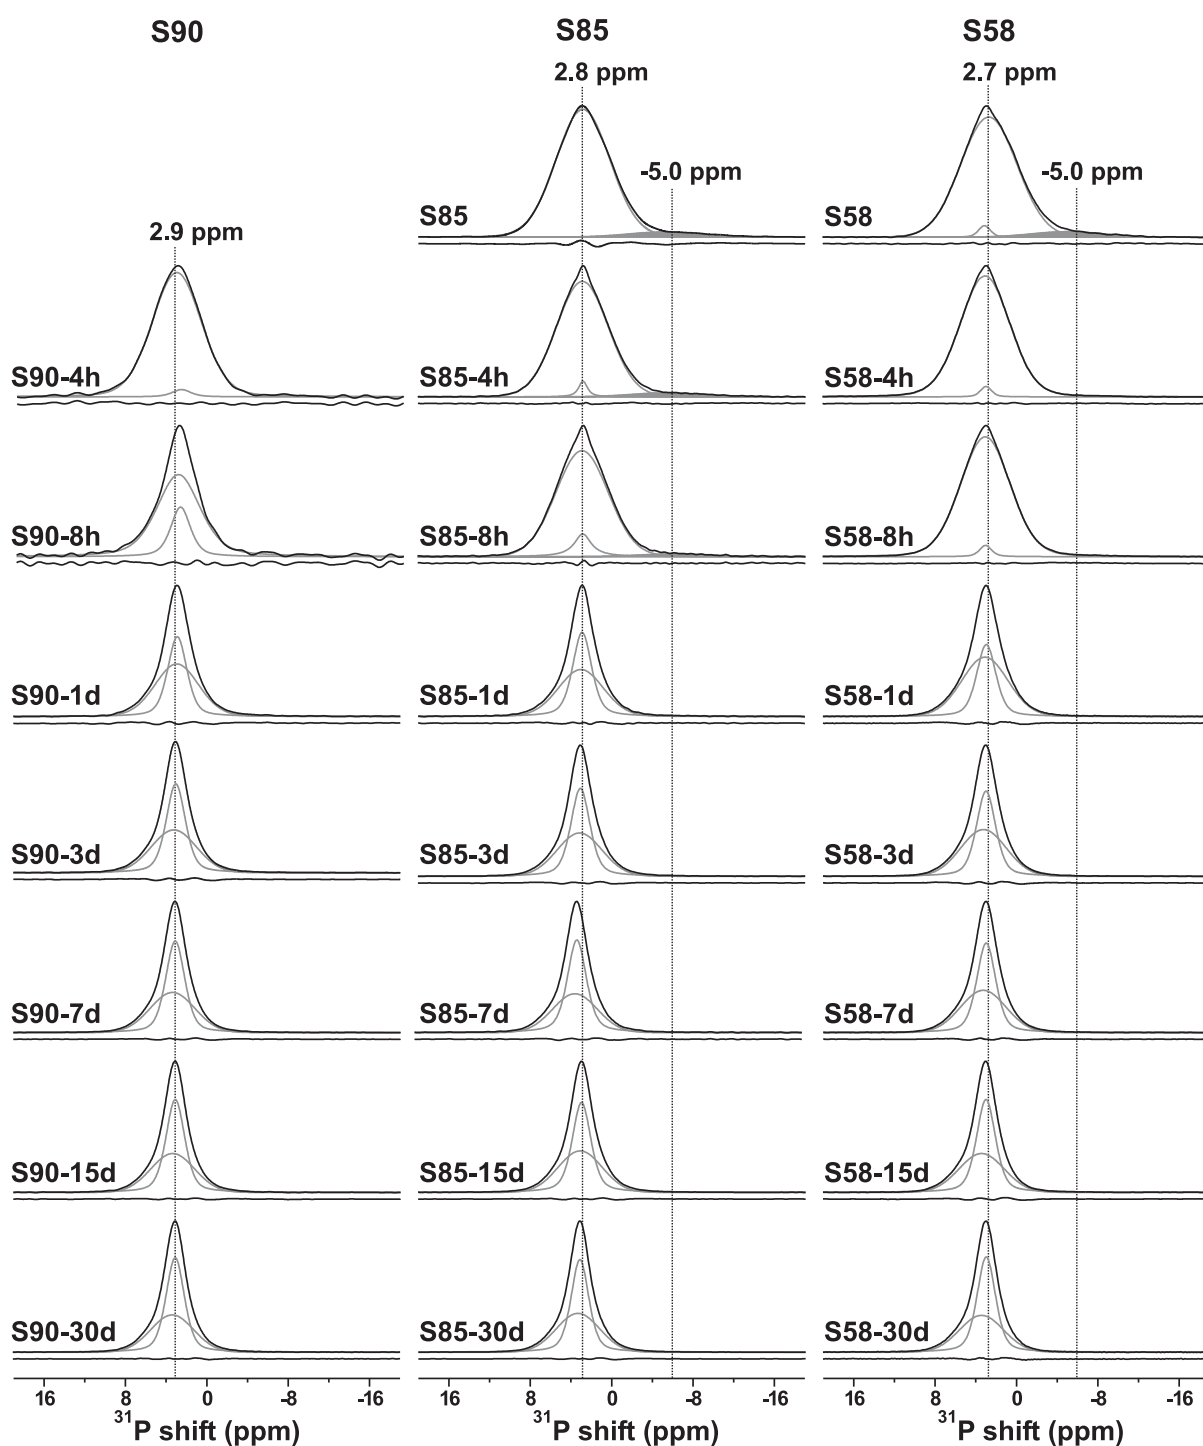

**Figure S1.** Experimental  $^{31}\text{P}$  NMR spectra (black traces) recorded by single pulses from the as-indicated S90- $\tau_{\text{SBF}}$  (left panel), S85- $\tau_{\text{SBF}}$  (middle panel), and S58- $\tau_{\text{SBF}}$  (right panel) samples, where  $\tau_{\text{SBF}}$  denotes the SBF-immersion interval specified either in hours (h) or days (d). The grey traces correspond to peak components of HCA (narrow signal) and ACP (broad signal) obtained by deconvoluting the respective experimental NMR spectrum. The curve beneath each spectrum represents the deviation between the experimental and best-fit results. The resonances with gray shading observed from S85, S58, and S85-4h specimens stem from minor contributions of P–O–Si structural motifs; see Fig. 4 and the discussion thereof.
